# Supplementary material for: Reduced chronic restraint stress in mice overexpressing hyperactive proteasomes in the forebrain
Source: PubMed Central journal article supplement (PMC6958796; doi:10.1186/s13041-020-0548-y), 2020-01-13

A

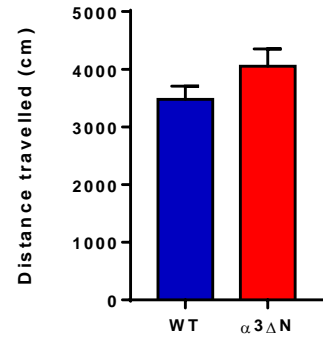

B

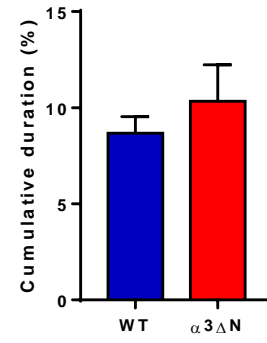

C

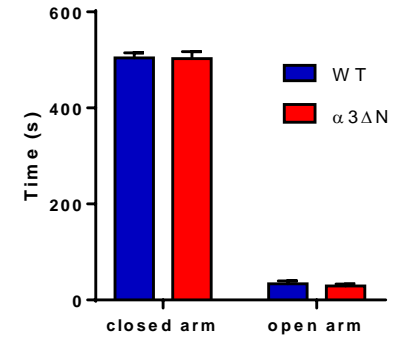

D

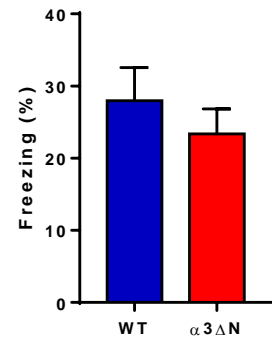

E

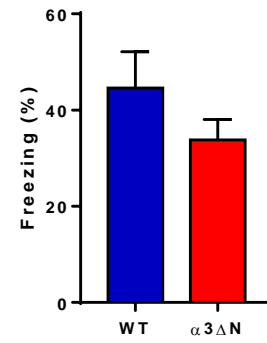

Supplement: 13041_2020_548_MOESM1_ESM.pdf [file 13041_2020_548_MOESM1_ESM.pdf]
